# Supplementary material
Source: publisher site journal article supplement (https://www.dovepress.com/article/supplementary_file/609884/609884%20Revised%20Supplementary%20Table%201.docx)
Supplement: Supplementary file 1 [file 609884%20Revised%20Supplementary%20Table%201.docx]

## Supplementary Table 1. Results of multinomial logistic regression ( high fall risk versus low fall risk )

| **Variable** | ***β*** | ***Z*** | **OR** | ***95% CI*** | **P value** |
| --- | --- | --- | --- | --- | --- |
| Age | 0.081 | 25.059 | 1.085 | 1.078–1.092 | <0.001 |
| Sex | 0.141 | 2.974 | 1.151 | 1.049–1.263 | 0.003 |
| Marital status | 0.129 | 2.210 | 1.137 | 1.015–1.275 | 0.027 |
| Educational level | −0.055 | −1.607 | 0.947 | 0.885–1.012 | 0.108 |
| Place of residence | −0.153 | −3.144 | 0.858 | 0.781–0.944 | 0.002 |
| Smoking | −0.019 | −0.276 | 0.982 | 0.860–1.121 | 0.783 |
| Alcohol consumption | −0.069 | −0.919 | 0.934 | 0.807–1.081 | 0.358 |
| Number of children | 0.089 | 2.703 | 1.093 | 1.025–1.166 | 0.007 |
| Monthly household income | 0.006 | 0.267 | 1.006 | 0.962–1.052 | 0.789 |
| Social activities | −0.123 | −5.373 | 0.884 | 0.845–0.925 | <0.001 |
| Physical exercise | −0.309 | −14.755 | 0.734 | 0.705–0.765 | <0.001 |
| Intercept | −6.187 | −19.890 | 0.002 | 0.001–0.004 | <0.001 |
| *Note: β, regression coefficient; Z, Z statistic; OR, odds ratio; CI, confidence interval. Outcome: high fall risk (reference = low fall risk). Overall model: Likelihood ratio χ² = 1611.007, df = 11, P < 0.001; McFadden R 2 = 0.104. Total valid samples = 13,970.* | | | | | |
